# Supplementary material for: Highly electronegative LDL from patients with ST-elevation myocardial infarction triggers platelet activation and aggregation
Source: Oxford University Press journal article supplement (doi:10.1182/blood-2013-05-504639), 2013-09-12
Supplement: blood-2013-05-504639-1.pdf [file blood-2013-05-504639-1.pdf]

## **Highly electronegative LDL from patients with ST-elevation myocardial infarction triggers platelet activation and aggregation**

Running head: Thrombogenicity of electronegative LDL

Hua-Chen Chan\*<sup>1,2,3</sup>, Liang-Yin Ke\*<sup>1,3,4</sup>, Chih-Sheng Chu<sup>1,4,5</sup>, An-Sheng Lee<sup>2,6</sup>, Ming-Yi Shen<sup>2</sup>, Miguel A. Cruz<sup>7</sup>, Jin-Fang Hsu<sup>2</sup>, Kai-Hung Cheng<sup>1,5</sup>, Hsiu-Chuan Bonnie Chan<sup>4,5</sup>, Jonathan Lu<sup>3</sup>, Wen-Ter Lai<sup>5</sup>, Tatsuya Sawamura<sup>8</sup>, Sheng-Hsiung Sheu<sup>5</sup>, Jeng-Hsien Yen<sup>5</sup>, Chu-Huang Chen<sup>2,3,4,7</sup>

From the <sup>1</sup>Graduate Institute of Medicine, College of Medicine, Kaohsiung Medical University (KMU), Kaohsiung, Taiwan; <sup>2</sup>Graduate Institute of Clinical Medical Science, China Medical University (CMU), and L5 Research Center, CMU Hospital, Taichung, Taiwan; <sup>3</sup>Vascular and Medicinal Research, Texas Heart Institute, Houston, TX, USA; <sup>4</sup>Center for Lipid Research, KMU Hospital, Kaohsiung, Taiwan; <sup>5</sup>College of Medicine, KMU, and Department of Internal Medicine, KMU Hospital, Kaohsiung, Taiwan; <sup>6</sup>Department of Medicine, Mackay Medical College, New Taipei, Taiwan; <sup>7</sup>Section of Cardiovascular Research, Department of Medicine, Baylor College of Medicine, Houston, TX, USA; and <sup>8</sup>Department of Vascular Physiology, National Cerebral and Cardiovascular Center, Osaka, Japan.

\*Hua-Chen Chan and Liang-Yin Ke contributed equally to this work.

Correspondence to Chu-Huang Chen, MD, PhD, Vascular and Medicinal Research, Texas Heart Institute, 6770 Bertner Avenue, Houston, Texas 77030; phone: 832-355-9026; fax: 832-355-9333; e-mail: cchen@texasheart.org; or Jeng-Hsien Yen, MD, PhD, Department of Internal Medicine, Kaohsiung Medical University Hospital, Kaohsiung, Taiwan; phone: +886 7 3121101ext 6088; fax: +886 7 3118141; e-mail: jehsye@cc.kmu.edu.tw.

\*Hua-Chen Chan and Liang-Yin Ke contributed equally to this work.

## **Supplemental Material**

### **Detailed Methods**

#### **Clinical diagnosis**

Patients with STEMI typically experienced persistent chest pain, and their EKGs showed ST elevation  $>0.1$  mV in at least 2 contiguous precordial leads or at least 2 adjacent limb leads, with or without elevation of cardiac enzymes. Blood samples were collected after the insertion of an intravenous catheter, before administering 0.9% normal saline and primary percutaneous coronary intervention for acute STEMI patients. During the recovery stage, continual cardiac enzyme testing was required for monitoring heart muscle damage. For patients with STEMI, tests for complete blood count, platelet count, and hemostasis (PTp, PTc, PT/INR, PPTp, and PPTc) were performed. For the diagnosis of MI, cardiac enzyme levels were measured for cardiac troponin I, creatine kinase–MB (the heart isoenzyme of creatine kinase), and creatine phosphokinase. Brain natriuretic peptide was measured to reflect the severity of concomitant heart failure. Lipid parameters measured in the blood of patients with STEMI included total cholesterol, triglyceride, high-density lipoprotein cholesterol (HDL-C), LDL cholesterol (LDL-C; also measured in control subjects), and fasting blood sugar.

#### **LDL sample preparation**

To prevent contamination and protein degradation, 1% penicillin/streptomycin and Complete Protease Inhibitor Cocktail (Roche Diagnostics, Indianapolis, IN; 1 tablet/100 mL plasma) were added into plasma samples. EDTA (0.5 mg/mL) and N<sub>2</sub> were also added to avoid sample oxidation during the entire process of preparation and preservation. The isolated subfractions were N<sub>2</sub>-sealed and stored at 4°C during sample characterization.<sup>16</sup>

#### **LDL analysis**

Because L1 and L5 from STEMI patients may differ from those of previously studied subjects, we characterized the effects of all L1 and L5 subfractions on EC apoptosis as previously described<sup>10</sup> and examined the apolipoprotein content of all L1 and L5 subfractions by performing sodium dodecyl sulfate

polyacrylamide gel electrophoresis (SDS-PAGE; 4-20%). We also compared platelet-activating factor (PAF) components in L1 and L5 from healthy subjects (n=2) and patients STEMI (n=7) by using electrospray ionization mass spectrometry.

### **Parallel plate flow chamber assay**

We performed a parallel plate flow chamber assay similar to that described by Cruz and colleagues.<sup>23</sup> A fibrinogen-coated dish formed the lower surface of the parallel plate flow chamber, and a silicone rubber gasket determined the flow path height of 254  $\mu\text{m}$ . The flow chamber was filled with phosphate-buffered saline (PBS). PRP was aspirated through the flow path by using a syringe pump (Harvard Apparatus Inc.). The flow rate was 0.6 mL/min and produced a wall shear rate of 1500  $\text{S}^{-1}$ .

### **Western blot analysis**

Protein concentrations were measured by using the Bradford assay (Biorad). To probe membrane proteins, we used goat anti-phosphorylated PKC $\alpha$  (Santa Cruz Biotechnology, Inc.), mouse anti-PKC $\alpha$  (EMD Millipore Corp.), rabbit anti-phosphorylated PI3K (Cell Signaling Technology), rabbit anti-PI3K (Santa Cruz Biotechnology, Inc.), rabbit anti-phosphorylated Akt (Santa Cruz Biotechnology, Inc.), and rabbit anti-Akt (Santa Cruz Biotechnology, Inc.) antibodies. Secondary anti-rabbit, -goat, and -mouse IgG antibodies were conjugated to horseradish peroxidase (GeneTex Inc.). Signals were amplified by using ECL Plus chemiluminescent reagents (Millipore) and were recorded and visualized with a G:Box iChemiXT image analyzer (Syngene).

**Supplemental Table 1. Patient Characteristics and Biochemical Profiles**

| <b>Baseline characteristic</b> | <b>Control<br/>(n=30)</b> | <b>STEMI<br/>(n=30)</b> | <b>P-value</b>       |
|--------------------------------|---------------------------|-------------------------|----------------------|
| Male: Female                   | 14:16                     | 25:5                    | 0.003 <sup>c</sup>   |
| Age (yr)                       | 37.2 ± 10.6               | 59.2 ± 13.3             | < 0.001 <sup>d</sup> |
| Patient history                |                           |                         |                      |
| Hypertension                   | 0.10 (3/30)               | 0.43 (13/30)            | 0.004 <sup>c</sup>   |
| Diabetes                       | 0.13 (4/30)               | 0.47 (14/30)            | 0.005 <sup>c</sup>   |
| Medications <sup>a</sup>       |                           |                         |                      |
| Antiplatelet drugs             | NA                        | 0.13 (4/30)             | -                    |
| Statins                        | NA                        | 0.07 (2/30)             | -                    |
| Waist (cm)                     | 77.5 ± 10.0               | NA                      | -                    |
| Systolic BP (mm Hg)            | 112.1 ± 15.5              | NA                      | -                    |
| Diastolic BP (mm Hg)           | 74.2 ± 12.3               | NA                      | -                    |
| Glu AC (mg/dL)                 | 95.3 ± 18.2               | 113.3 ± 23.4            | 0.002 <sup>e</sup>   |
| Lipid profile                  |                           |                         |                      |
| T-CHOL (mg/dL)                 | 179.3 ± 32.9              | 179.1 ± 33.9            | 0.985 <sup>d</sup>   |
| TG (mg/dL)                     | 78.6 ± 59.8               | 119.6 ± 65.6            | 0.001 <sup>e</sup>   |
| HDL-C (mg/dL)                  | 55.6 ± 14.2               | 38.5 ± 8.6              | < 0.001 <sup>d</sup> |
| LDL-C (mg/dL)                  | 108.1 ± 28.4              | 116.7 ± 32.4            | 0.281 <sup>d</sup>   |
| L5%                            | 1.5 ± 1.1                 | 15.4 ± 14.5             | < 0.001 <sup>e</sup> |
| [L5] <sup>b</sup> (mg/dL)      | 1.7 ± 1.5                 | 18.9 ± 21.0             | < 0.001 <sup>e</sup> |
| Cardiac enzymes                |                           |                         |                      |
| TropI (ng/mL)                  | NA                        | 69.2 ± 53.3             | -                    |
| CK-MB (ng/mL)                  | NA                        | 186.2 ± 133.8           | -                    |
| CPK (IU/L)                     | NA                        | 2011 ± 1340             | -                    |
| CK-MB/CPK                      | NA                        | 9.5 ± 3.7               | -                    |
| BNP (pg/mL)                    | NA                        | 616.6 ± 938.3           | -                    |

STEMI, ST-elevation myocardial infarction; BP, blood pressure; Glu AC, fasting blood sugar; T-CHOL, total cholesterol; TG, triglyceride; HDL-C, high-density lipoprotein cholesterol; LDL-C, low-density lipoprotein cholesterol; L5%, L5 percentage; TropI, cardiac troponin I; NA, not analyzed; CK-MB, the heart isoenzyme of creatine kinase; CPK, creatine phosphokinase; BNP, brain natriuretic peptide.

<sup>a</sup>Medications taken within the 3 months preceding study enrollment, including antiplatelet drugs such as aspirin and clopidogrel; statins such as atorvastatin and rosuvastatin; and high blood pressure treatment such as amlodipine and amlodine/benazepril.

<sup>b</sup>[L5], the concentration of L5, calculated as  $L5\% \times LDL-C$  (mg/dL).

<sup>c</sup>*P*-value was determined by using the chi-square test.

<sup>d</sup>*P*-value was determined by using a *t* test.

<sup>e</sup>*P*-value was determined by using the Wilcoxon rank-sum test. Nonparametric statistical analysis was performed because sample values did not conform to a normal distribution (Shapiro–Wilk test for normality,  $P < 0.01$ ).

**Supplemental Table 2. Stratified Analysis of L5% in Patients With STEMI and Control Subjects**

| <b>Characteristics</b> | <b>Controls</b>  | <b>STEMI patients</b> | <b>P-value<sup>a</sup></b> |
|------------------------|------------------|-----------------------|----------------------------|
| Gender: Male           | 1.3 ± 0.4 (n=14) | 13.9 ± 14.2 (n=25)    | <0.0001                    |
| Gender: Female         | 1.7 ± 1.4 (n=16) | 22.8 ± 15.0 (n=5)     | 0.001                      |
| Non-obese              | 1.4 ± 0.7 (n=29) | 15.5 ± 14.7 (n=29)    | <0.0001                    |
| Diabetic               | 1.7 ± 0.4 (n=4)  | 18.7 ± 12.1 (n=13)    | 0.007                      |
| Non-diabetic           | 1.5 ± 1.2 (n=26) | 12.8 ± 16.0 (n=17)    | <0.0001                    |
| Hypertensive           | 1.6 ± 0.4 (n=7)  | 13.6 ± 8.8 (n=16)     | 0.0005                     |
| Non-hypertensive       | 1.5 ± 1.2 (n=23) | 17.9 ± 19.3 (n=14)    | <0.0001                    |
| Dyslipidemic           | 1.6 ± 0.4 (n=7)  | 11.3 ± 9.2 (n=14)     | 0.002                      |
| Non-dyslipidemic       | 1.5 ± 1.2 (n=23) | 18.9 ± 17.4 (n=16)    | <0.0001                    |
| Not using clopidogrel  | 1.5 ± 1.1 (n=30) | 15.5 ± 15.2 (n=27)    | <0.0001                    |
| Not using statins      | 1.5 ± 1.1 (n=30) | 15.9 ± 14.8 (n=28)    | <0.0001                    |

<sup>a</sup>P-values were determined by using a chi-squared test.
